# Supplementary material for: Dopamine-derived nanoparticles for the protection of irradiation-induced intestinal injury by maintaining intestinal homeostasis
Source: Royal Society of Chemistry journal article supplement (doi:10.1039/d1bm02026a), 2022-01-01

### Supporting information

**Figure S1:** HIEC cells were pretreated with 8  $\mu\text{g}/\text{mL}$  PDA-NPs or 50  $\mu\text{M}$  dopamine respectively, before 8 Gy IR. Cell viability was measured using the CCK-8 assay,  $n=3$ . Data were expressed as mean  $\pm$  SEM,  $*P < 0.05$ ,  $**P < 0.01$ .

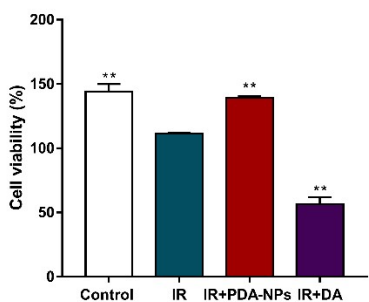

**Figure S2:** Zeta potential distribution of PDA-NPs.

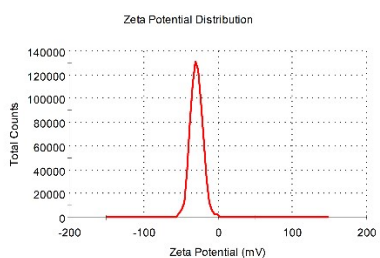

**Figure S3:** Kaplan-Meier survival analysis of mice after exposure to 15Gy ABI,  $n=10$ .

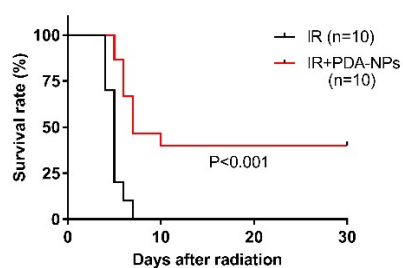

**Figure S4:** Western blot analysis of the expression of apoptosis and inflammation proteins in 8 Gy irradiated HIEC cells lysates,  $n=3$ .

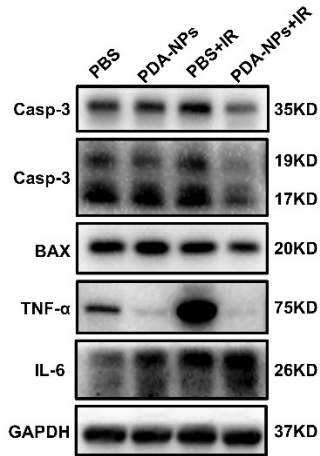

**Figure S5:** Western blot analysis of the expression of pyroptosis proteins in 8 Gy irradiated HIEC cells lysates, n=3.

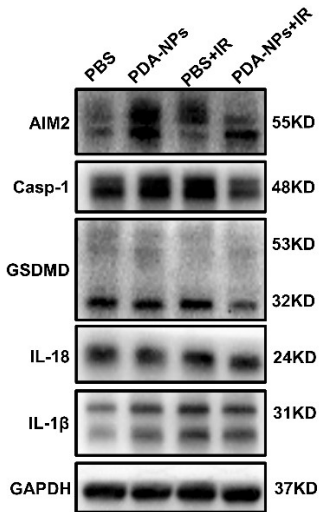

**Figure S6:** The expression of TNF-α mRNA in 10Gy tissue was detected by qPCR, n=3. Data were expressed as mean ± SEM, \* $P < 0.05$ , \*\* $P < 0.01$ .

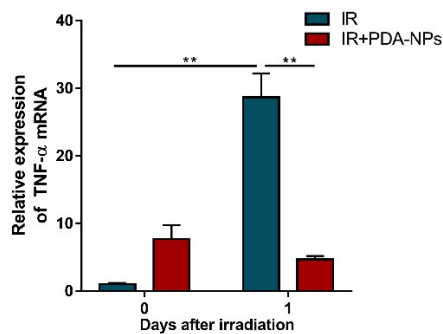

**Figure S7:** HIEC cell toxicity was monitored using the CCK-8 assay, n=3. Data were expressed as

mean  $\pm$  SEM, \* $P$  < 0.05, \*\* $P$  < 0.01.

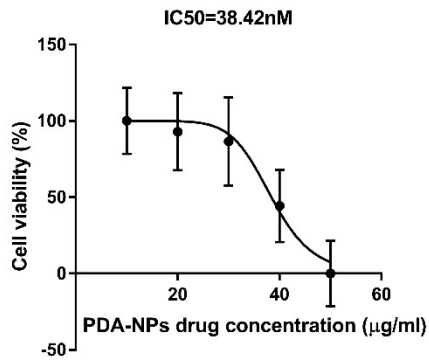

**Figure S8:** HIEC cells were pre-treated with 8 µg/mL PDA-NPs before 8 Gy IR and Cell viability was measured using the CCK-8 assay, n=3. Data were expressed as mean  $\pm$  SEM, \* $P$  < 0.05, \*\* $P$  < 0.01.

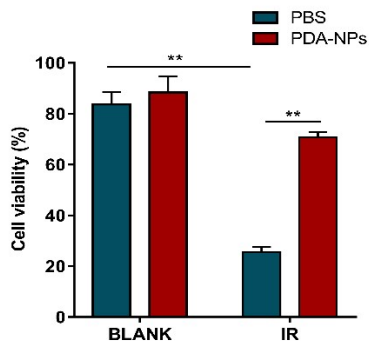

**Figure S9:** ESR spectrum of  $O_2^{\cdot-}$  with 8 µg/mL PDA-NPs in strong acid (pH=2).

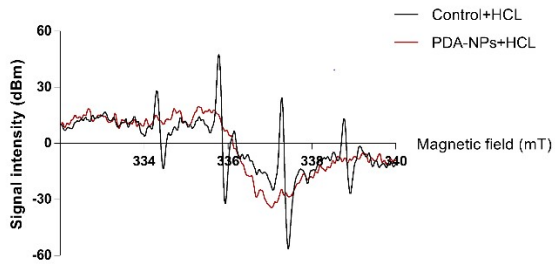

**Figure S10:** ESR spectrum of DPPH with 8 µg/mL PDA-NPs in strong acid (pH=2).

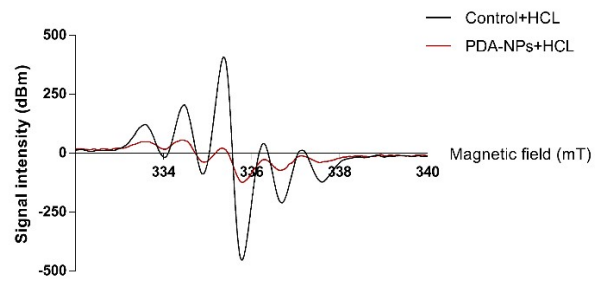

Supplement: d1bm02026a1.pdf [file d1bm02026a1.pdf]
